# Supplementary material
Source: MDPI journal article supplement (https://www.mdpi.com/2624-8549/4/1/18)
Supplement: s1 [file s1]

Supporting information for:

**A Sustainable Synthetic Approach to the Indaceno[1,2-b:5,6-b']dithiophene (IDT) Core through Cascade Cyclization–Deprotection Reactions**

**Giacomo Forti, Andrea Nitti, Gabriele Bianchi, Riccardo Po, and Dario Pasini\***

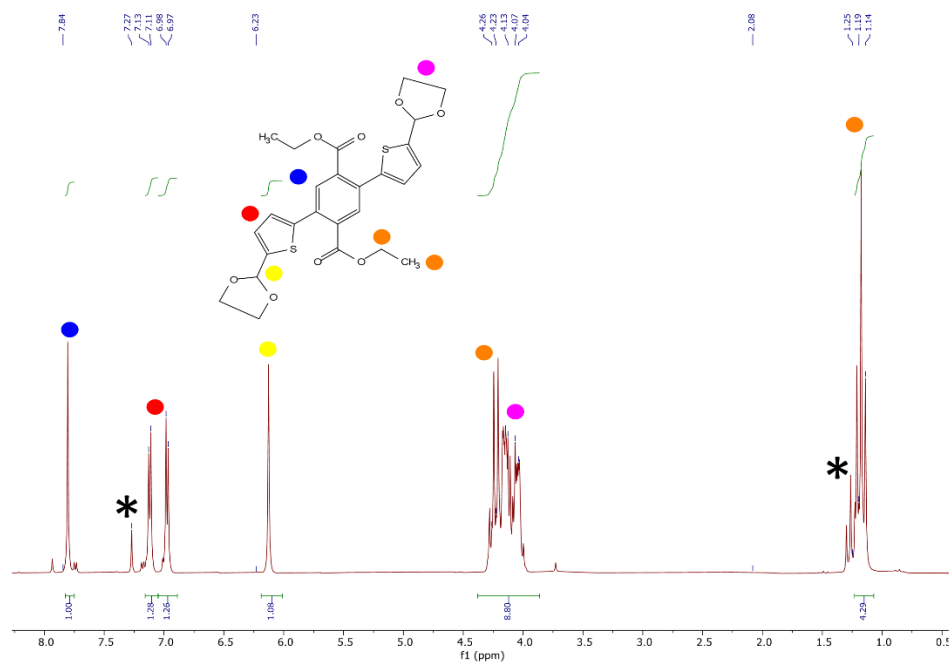

**Figure S1.**  $^1\text{H}$  NMR (400 MHz,  $\text{CDCl}_3$ ) of compound **1a**. The asterisks denote residual NMR or other solvent impurities.

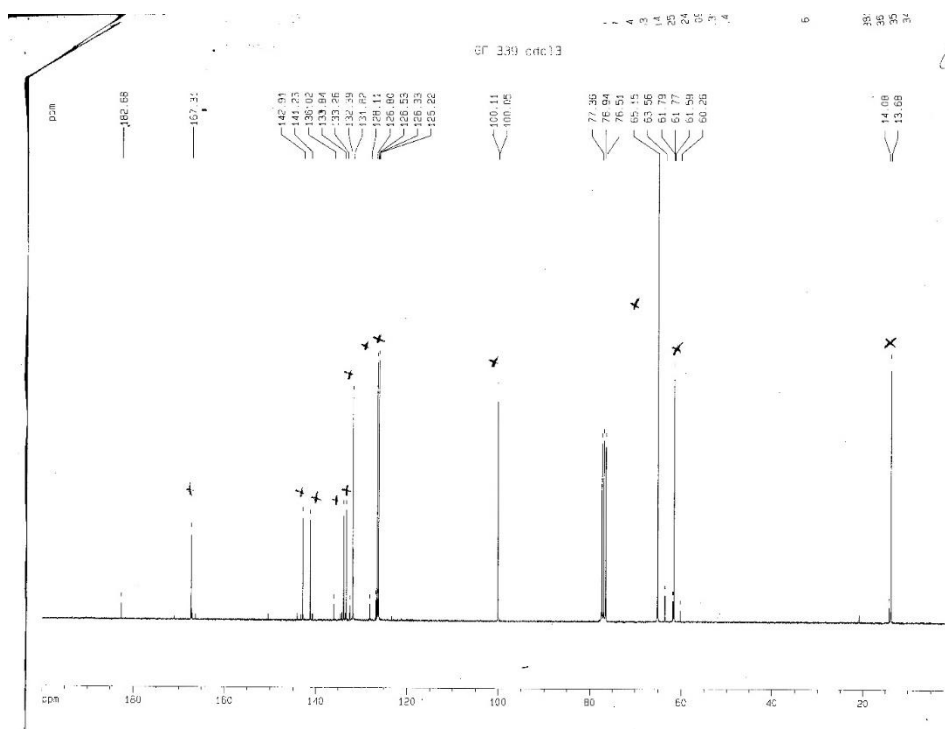

**Figure S2.**  $^{13}\text{C}$  NMR (75 MHz,  $\text{CDCl}_3$ ) of compound **1a**.

pasini07\_4 #1 RT: 0.00 AV: 1 NL: 2.68E4  
T: ITMS + c ESI sid=15.00 Full ms [150.00-2000.00]

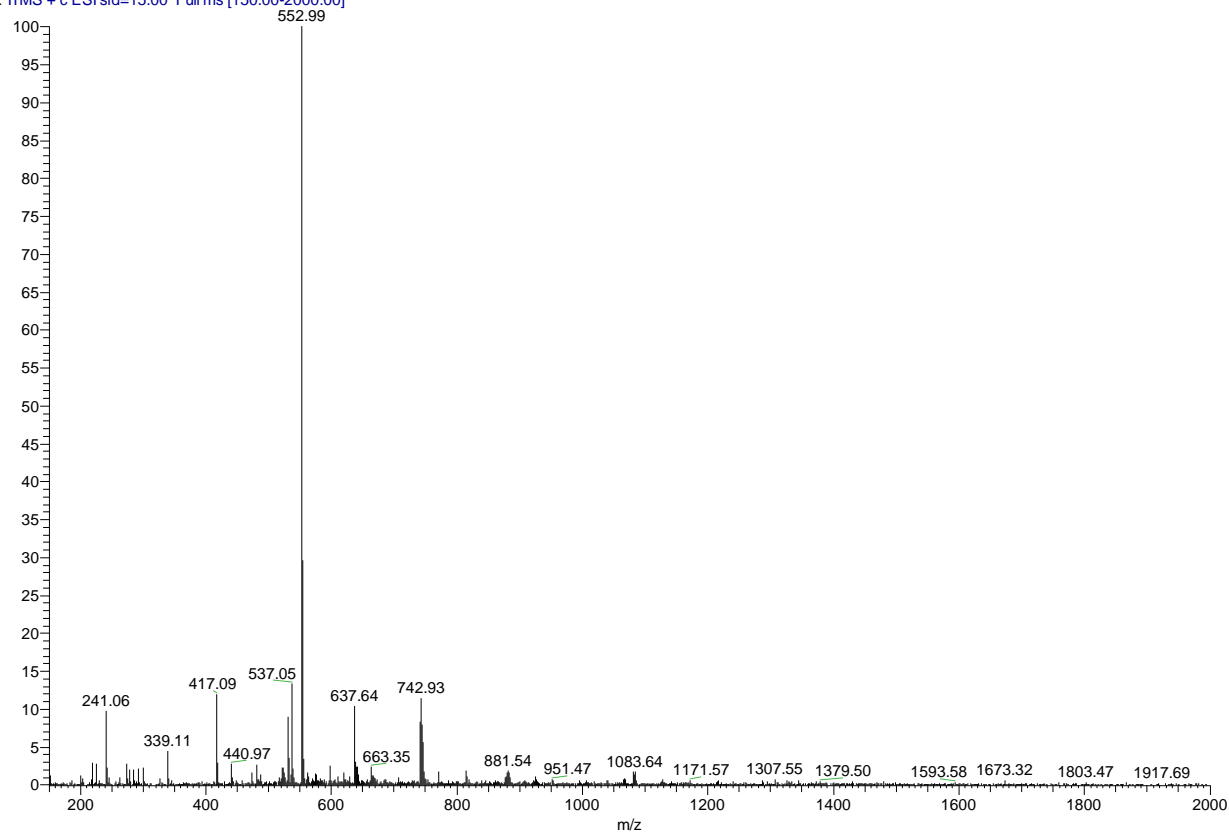

**Figure S3.** ESI-MS of compound **1a**.

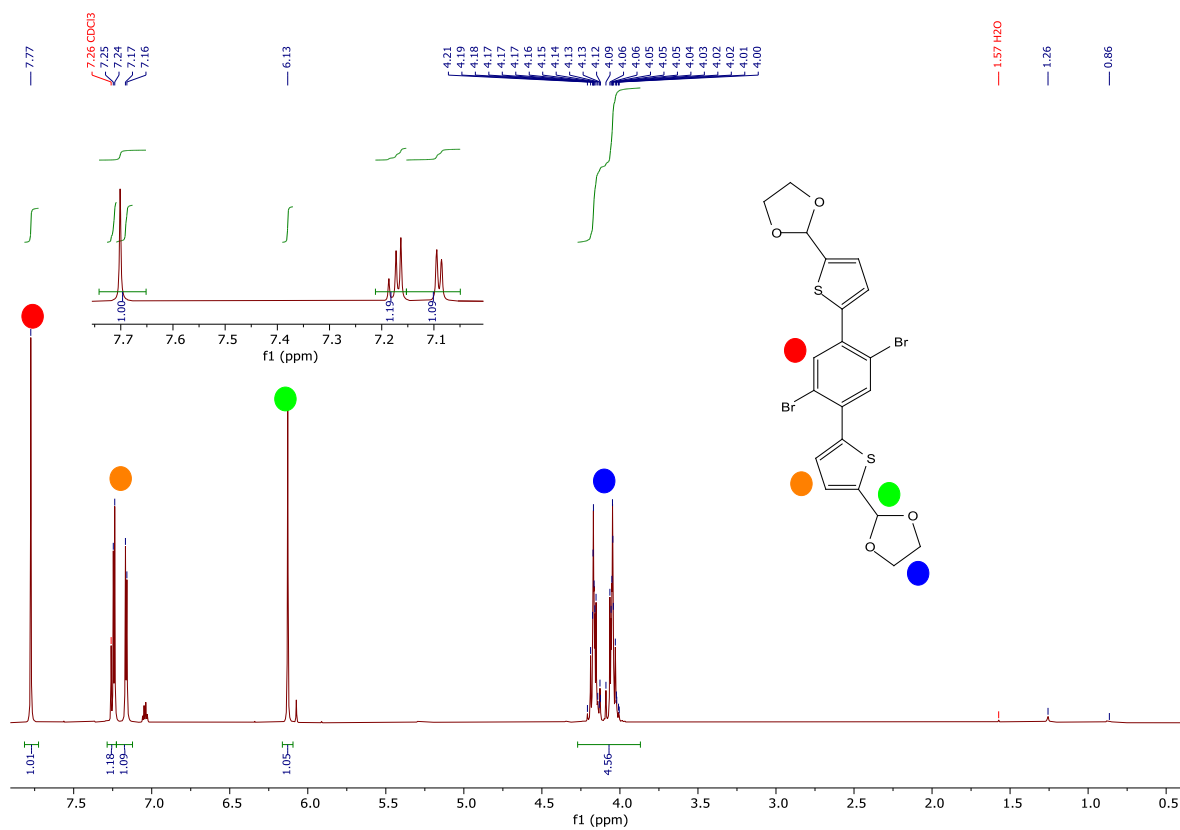

**Figure S4.** <sup>1</sup>H NMR (400 MHz, CDCl<sub>3</sub>) of compound **1b**.

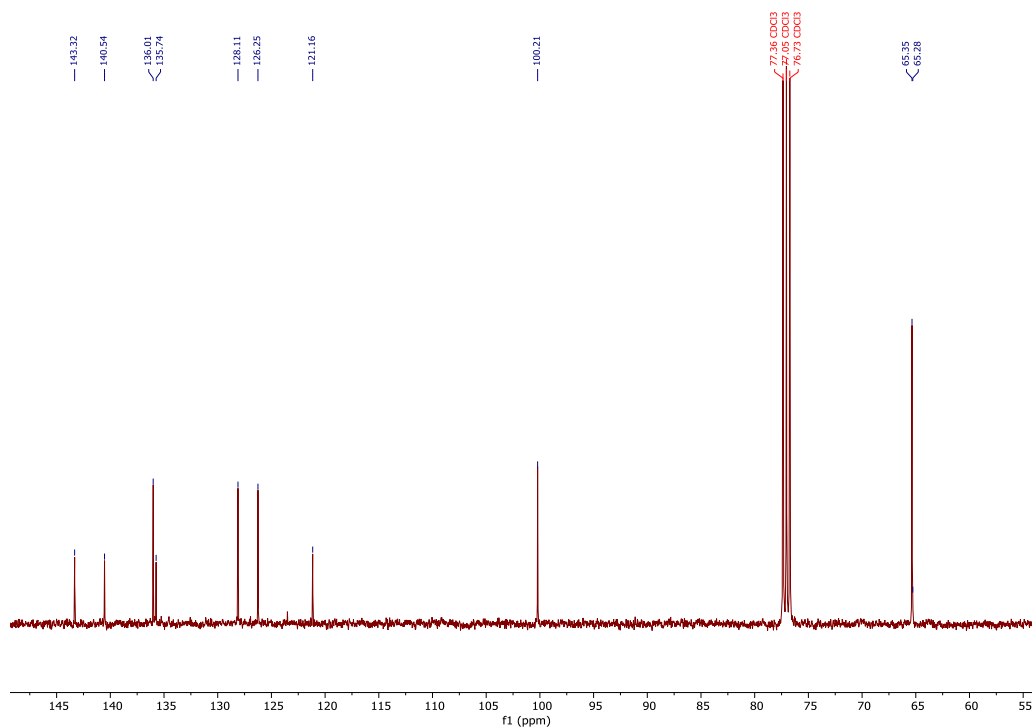

**Figure S5.** <sup>13</sup>C NMR (101 MHz, CDCl<sub>3</sub>) of compound **1b**.

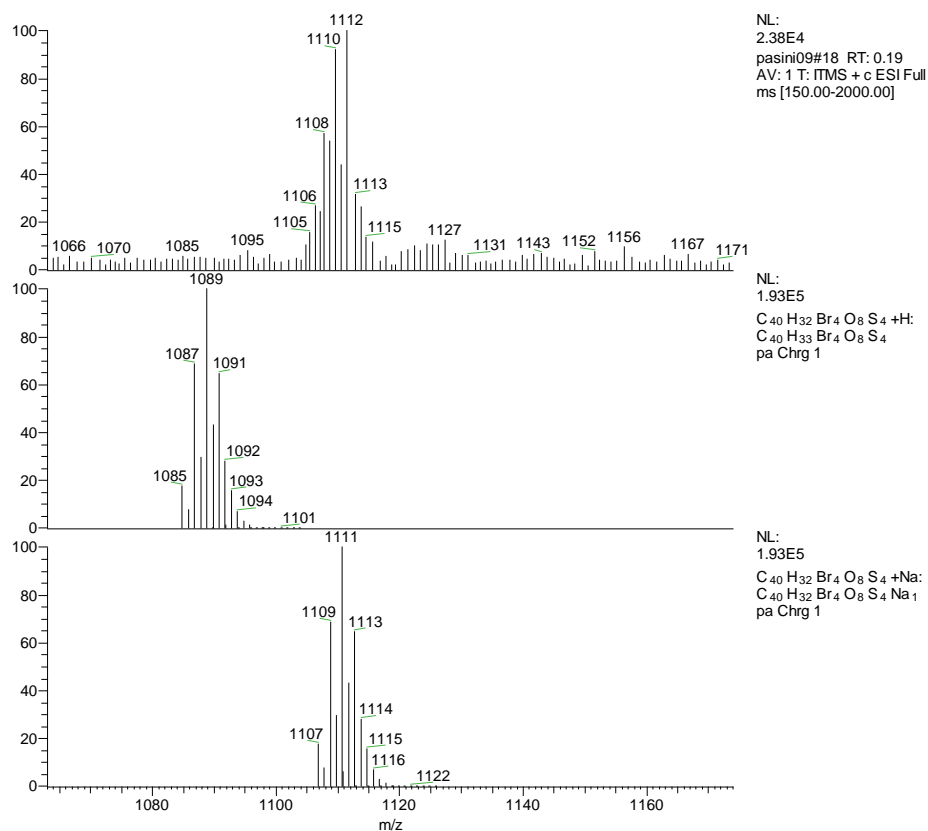

**Figure S6.** ESI-MS of compound **1b**.

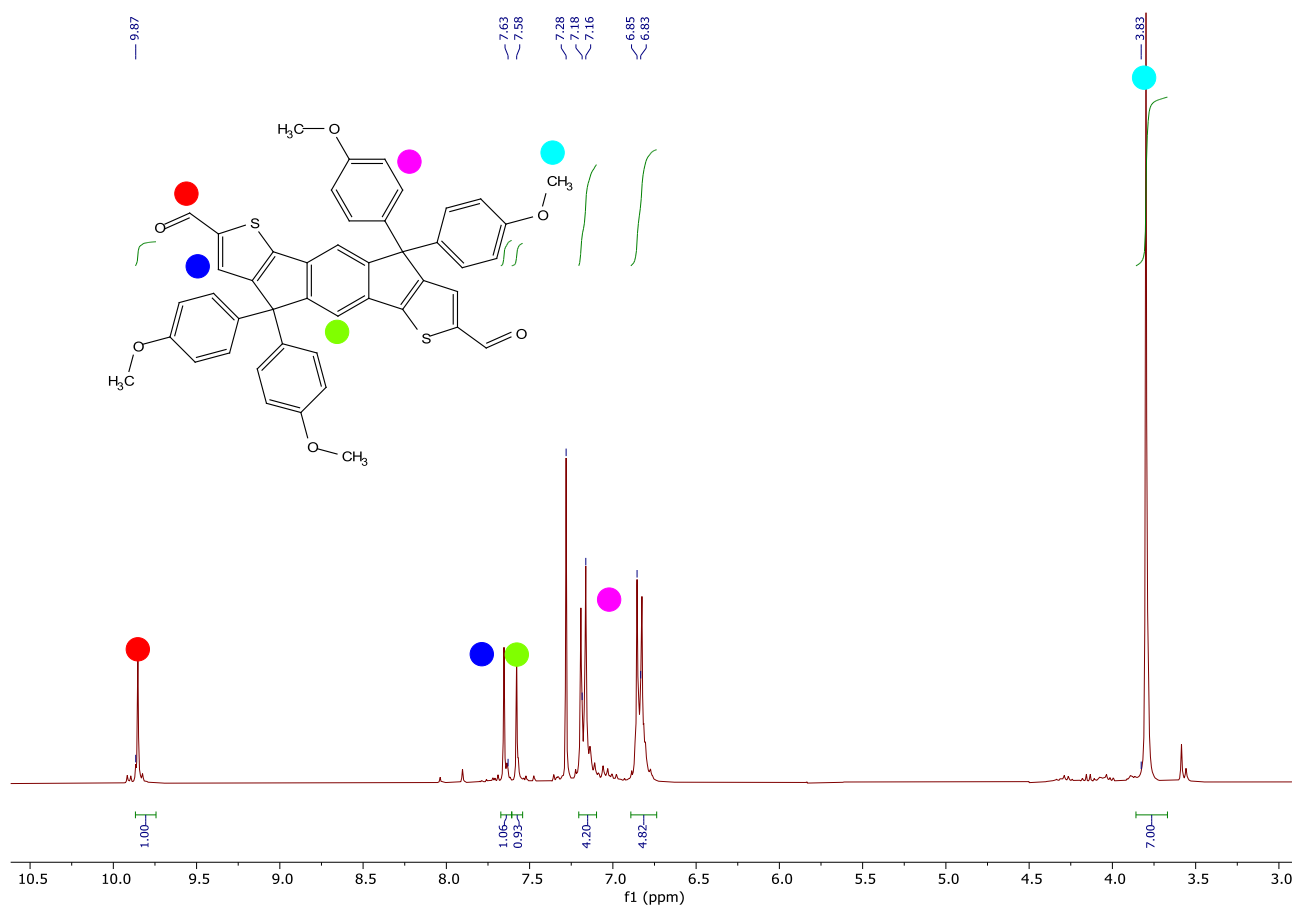

**Figure S7.** <sup>1</sup>H NMR (300 MHz, CDCl<sub>3</sub>) of compound **2a**.

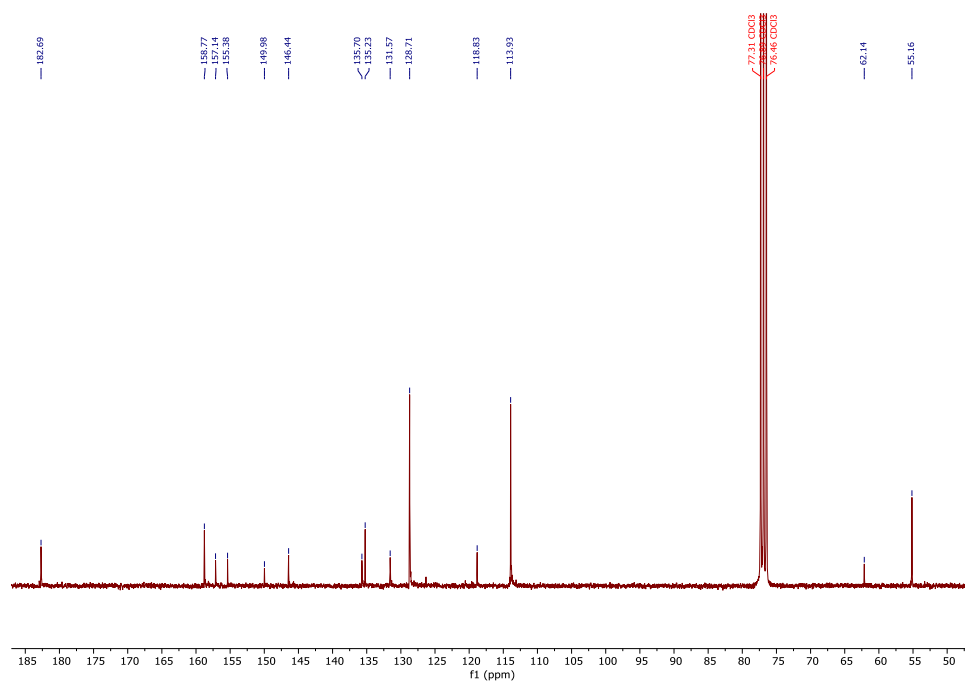

**Figure S8.** <sup>13</sup>C NMR (75 MHz, CDCl<sub>3</sub>) of compound **2a**.

PAS\_747 #1095 RT: 10.60 AV: 1 NL: 1.29E4  
T: ITMS + p ESI Full ms [120.00-2000.00]

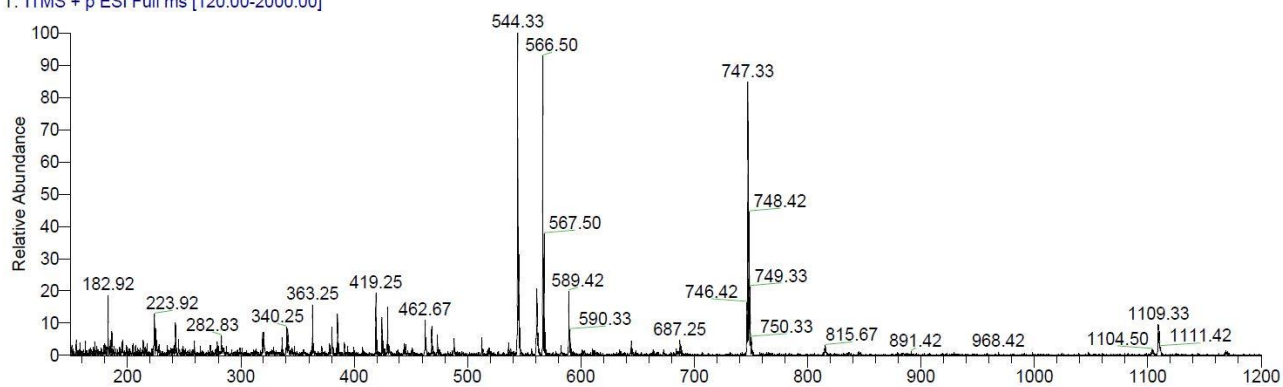

**Figure S9.** ESI-MS of compound **2a**.

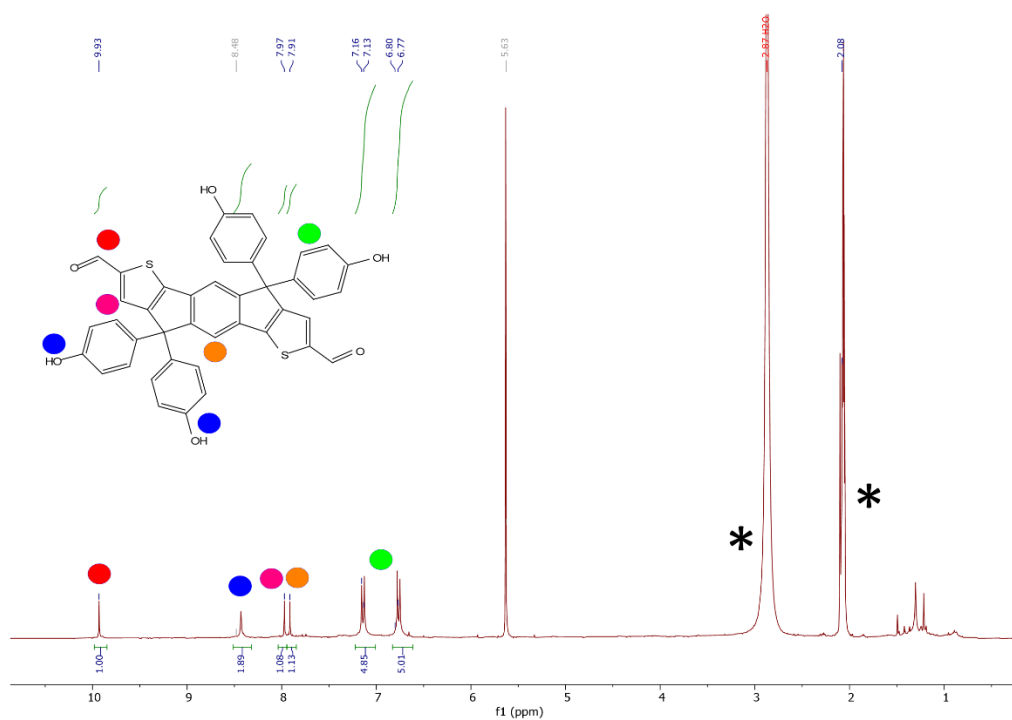

**Figure S10.**  $^1\text{H}$  NMR (300 MHz, acetone- $\text{d}_6$ ) of compound **3a**. The asterisks denote residual NMR or other solvent impurities.

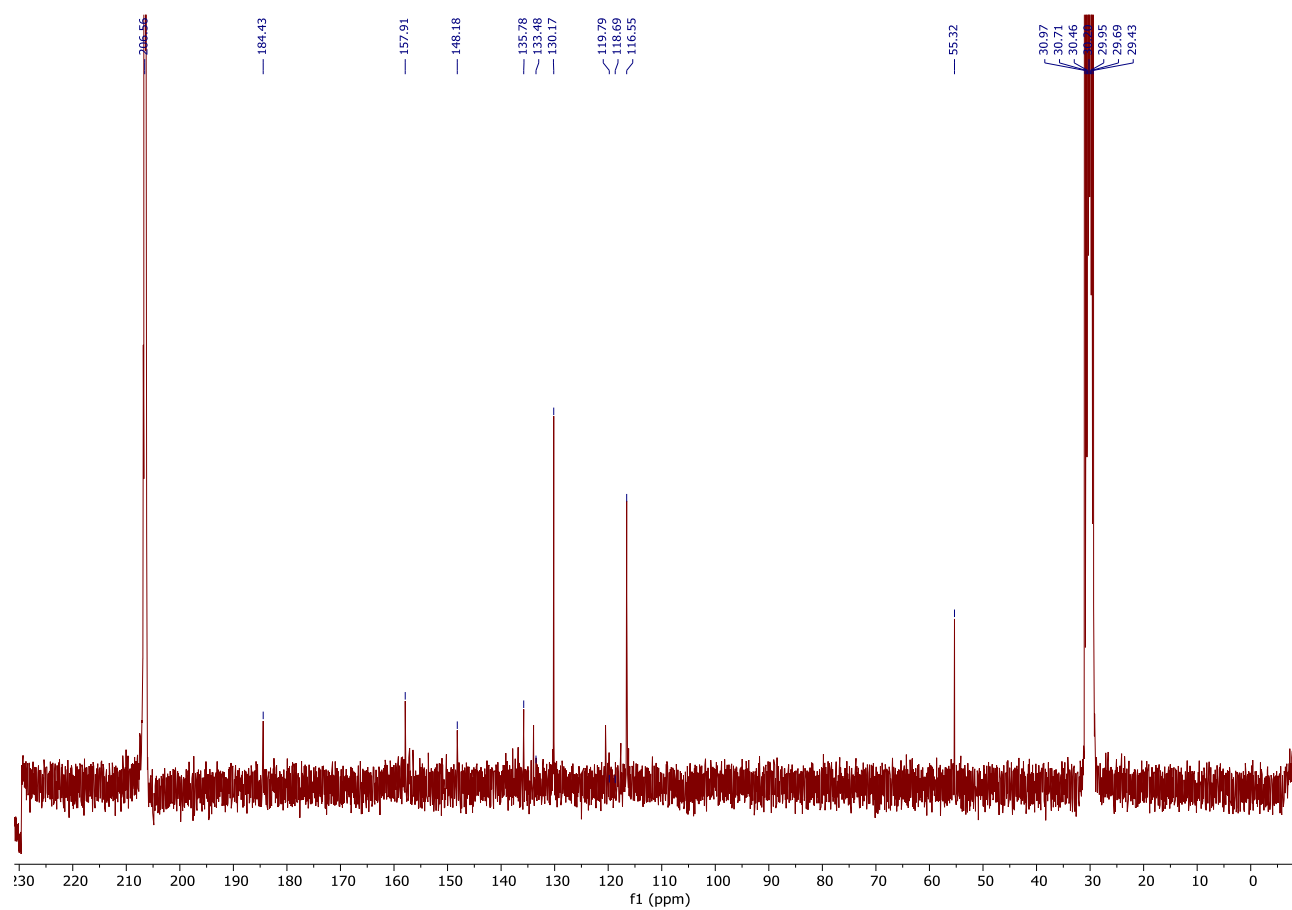

**Figure S11.** <sup>13</sup>C NMR (75 MHz, acetone-d<sub>6</sub>) of compound **3a**.

**Table S1.** Calculation of E factor for molecule **1a**.

|                                                              | Amount (g) | Waste (g) |
|--------------------------------------------------------------|------------|-----------|
| <i>diethyl 2,5-dibromoterephthalate</i>                      | 1          | -         |
| <i>(5-(1,3-dioxolan-2-yl)thiophen-2-yl)zinc(II) chloride</i> | 1.5        | -         |
| <i>Pd(PPh<sub>3</sub>)<sub>4</sub></i>                       | 0.122      | 0.122     |
| <i>NaHCO<sub>3</sub></i>                                     | 20         | 20        |
| <i>Na<sub>2</sub>SO<sub>4</sub></i>                          | 5          | 5         |
| <i>Silica gel</i>                                            | 20         | 20        |
| <i>Total</i>                                                 | 47.66      | 45.122    |

Total waste = 45.122 g; Compound obtained = 1.46 g

**E factor = 30.90**

**Table S2.** Calculation of E factor for molecule **2a**.

|                                            | Amount (g) | Waste (g) |
|--------------------------------------------|------------|-----------|
| <b>1a</b>                                  | 0.246      | 0.178     |
| <i>(4-methoxyphenyl) magnesium bromide</i> | 0.432      | 0.311     |
| <i>NaHCO<sub>3</sub></i>                   | 2.5        | 2.5       |
| <i>Na<sub>2</sub>SO<sub>4</sub></i>        | 2          | 2         |
| <i>AcOH</i>                                | 5.25       | 5.25      |
| <i>H<sub>2</sub>SO<sub>4</sub></i>         | 1          | 1         |
| <i>Silica gel</i>                          | 5          | 5         |
| <i>Total</i>                               | 16.36      | 16.239    |

Total waste = 16.239 g; Compound obtained = 0.095 g

**E factor = 170.93**



**Table S3.** Calculation of E factor for reported **IDT** precursor.

|                                         | Amount (g) | Waste (g) |
|-----------------------------------------|------------|-----------|
| <i>diethyl 2,5-dibromoterephthalate</i> | 4.48       | 1.21      |
| <i>2-Bromothiophene</i>                 | 1.66       | 0.44      |
| <i>Mg °</i>                             | 0.702      | 0.702     |
| <i>Zinc chloride</i>                    | 3.91       | 3.91      |
| <i>Pd(PPh<sub>3</sub>)<sub>4</sub></i>  | 0.266      | 0.266     |
| <i>Celite</i>                           | 20         | 20        |
| <i>Mg<sub>2</sub>SO<sub>4</sub></i>     | 10         | 10        |
| <i>Silica gel</i>                       | 80         | 80        |
| <i>Total</i>                            | 121.02     | 116.53    |

Total waste = 116.53 g; Compound obtained = 3.3 g

**E factor = 35.31**

**Table S4.** Calculation of E factor for reported **IDT** core (4-hexylaryl substituents).

|                                                   | Amount (g) | Waste (g) |
|---------------------------------------------------|------------|-----------|
| <i>diethyl 2,5-di(thiophen-2-yl)terephthalate</i> | 1          | 0.350     |
| <i>4-bromotoluene</i>                             | 2.64       | 0.92      |
| <i>Mg °</i>                                       | 0.378      | 0.378     |
| <i>Mg<sub>2</sub>SO<sub>4</sub></i>               | 5          | 5         |
| <i>AcOH</i>                                       | 100        | 100       |
| <i>H<sub>2</sub>SO<sub>4</sub></i>                | 2          | 2         |
| <i>Silica</i>                                     | 40         | 40        |
| <i>Total</i>                                      | 151.02     | 148.65    |

Total waste = 148.65 g; Compound obtained = 1.05 g

**E factor = 141.57**

**Table S5.** Calculation of E factor for the IDT dialdehyde core (hexyl substituents).

|                          | <i>Amount (g)</i> | <i>Waste (g)</i> |
|--------------------------|-------------------|------------------|
| <b><i>IDT</i></b>        | 0.768             | 0.261            |
| <b><i>n-BuLi</i></b>     | 0.646             | 0.646            |
| <b><i>THF</i></b>        | 163               | 163              |
| <b><i>DMF</i></b>        | 0.257             | 0.090            |
| <b><i>Brine</i></b>      | 20                | 20               |
| <b><i>Silica gel</i></b> | 20                | 20               |
| <b><i>Total</i></b>      | 204.4             | 204              |

Total waste = 204.4 g; Compound obtained = 0.530 g

$$\text{E factor} = 385.66$$

**Table S6.** E-factor comparison.

| <i>Molecule</i>     | <i>E-Factor tot</i> |
|---------------------|---------------------|
| <b>2a</b>           | 201.83              |
| IDT core dialdehyde | 562.54              |
